# Supplementary material for: Discrepant Phenotyping of Monocytes Based on CX3CR1 and CCR2 Using Fluorescent Reporters and Antibodies
Source: MDPI journal article supplement (doi:10.3390/cells13100819), 2024-05-10
Supplement: s1 [file s1]

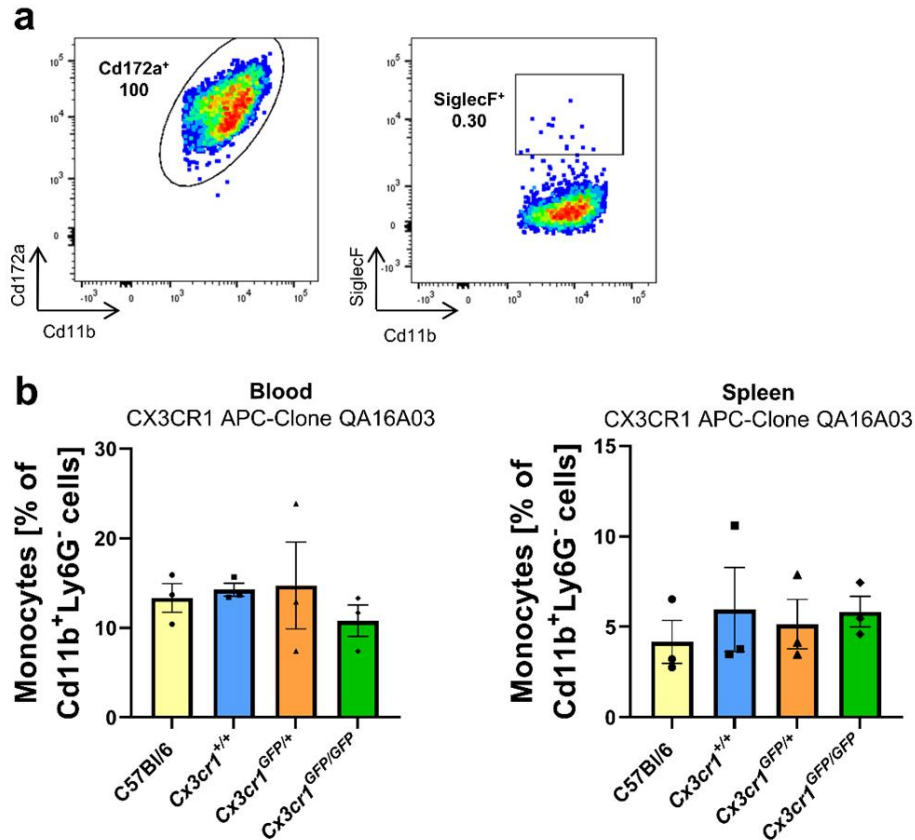

**Supplemental Figure S1:** Validation of the flow cytometry gating (a) Expression of Cd172a and SiglecF on monocytes as identified in Figure 1. (b) Quantification of Cd11b<sup>+</sup>Ly6G<sup>-</sup>Cd115<sup>+</sup> monocytes in C57Bl/6 WT mice, WT littermates (*Cx3cr1*<sup>+/+</sup>), heterozygous *Cx3cr1*<sup>GFP/+</sup> and homozygous *Cx3cr1*<sup>GFP/GFP</sup> mice in the peripheral blood (left panel) and the spleen (right panel; *n* = 3). Similar results were obtained with all other CX3CR1 antibody clones used in this study.

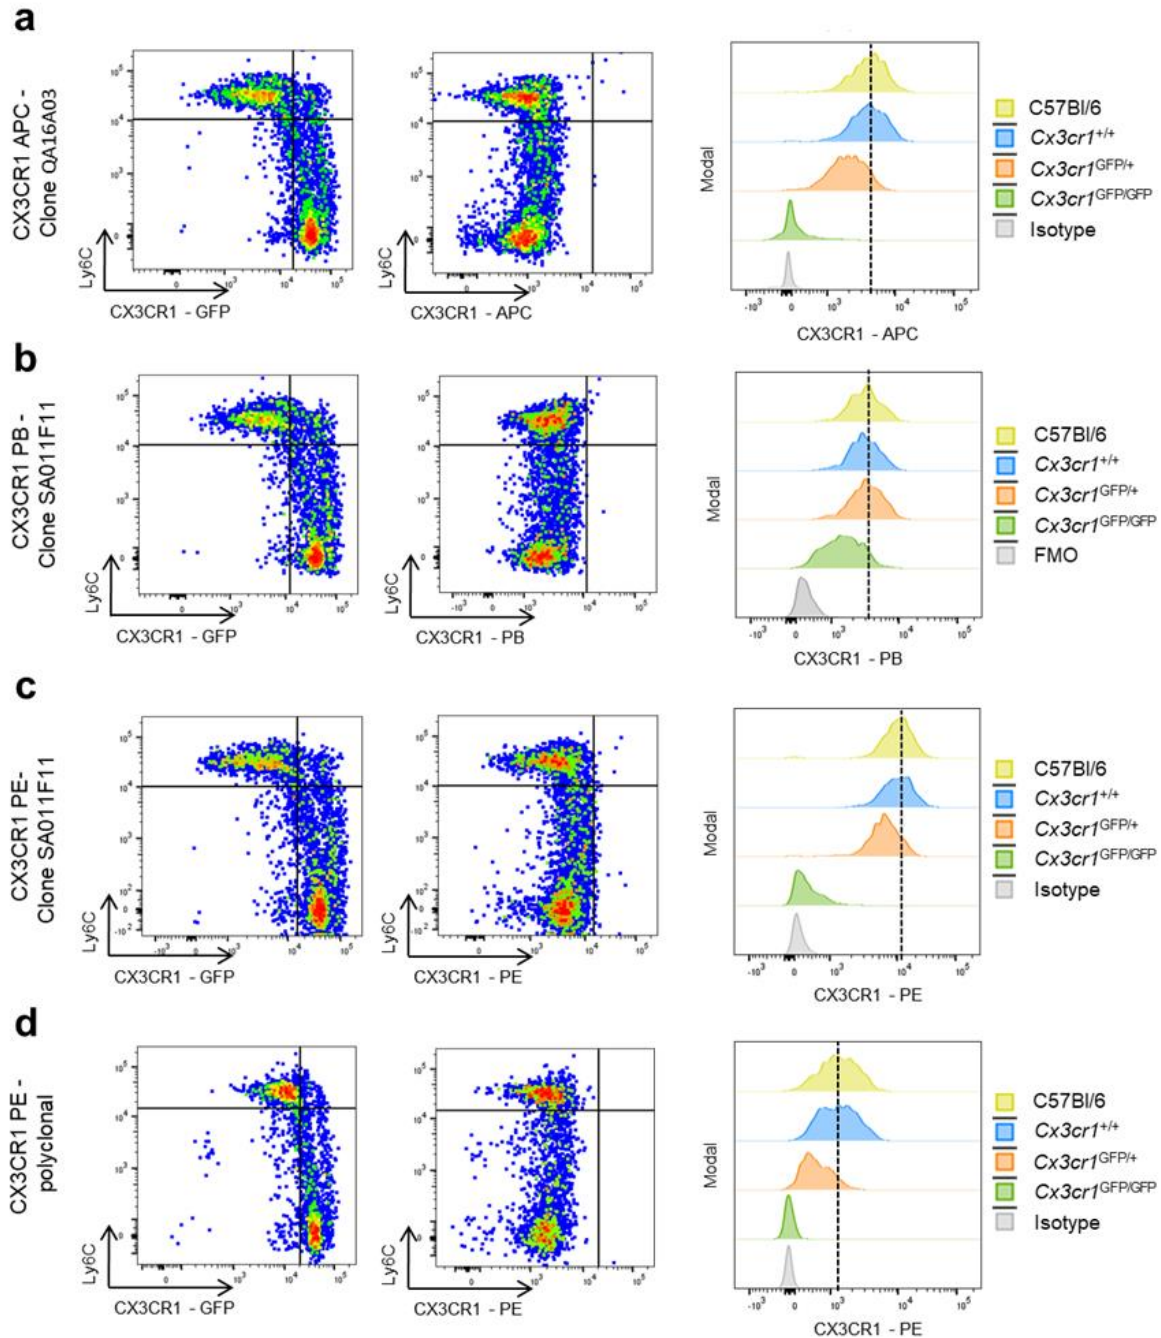

**Supplemental Figure S2:** Differential CX3CR1 reporter fluorescence signal, but not antibody staining on peripheral blood monocytes in mice using different validated anti-CX3CR1 antibodies. **(a-d)** Representative flow cytometry showing the GFP signal (left panels) or antibody staining of CX3CR1 clone QA16A03 (APC, BioLegend) **(a)**, CX3CR1 clone SA011F11 (PB, BioLegend) **(b)**, CX3CR1 clone SA011F11 (PE, BioLegend) **(c)** or CX3CR1 polyclonal (PE, R&D) **(d)** (middle panel) of peripheral blood monocytes from the same *Cx3cr1*<sup>GFP/+</sup> reporter mice. Right panels: representative histograms of CX3CR1 antibody staining on monocytes from C57Bl/6 (WT, yellow) mice, WT littermates (*Cx3cr1*<sup>+/+</sup>, blue), heterozygous *Cx3cr1*<sup>GFP/+</sup> mice (red), homozygous *Cx3cr1*<sup>GFP/GFP</sup> mice (green) and isotype or fluorescence minus one (FMO) control (grey).

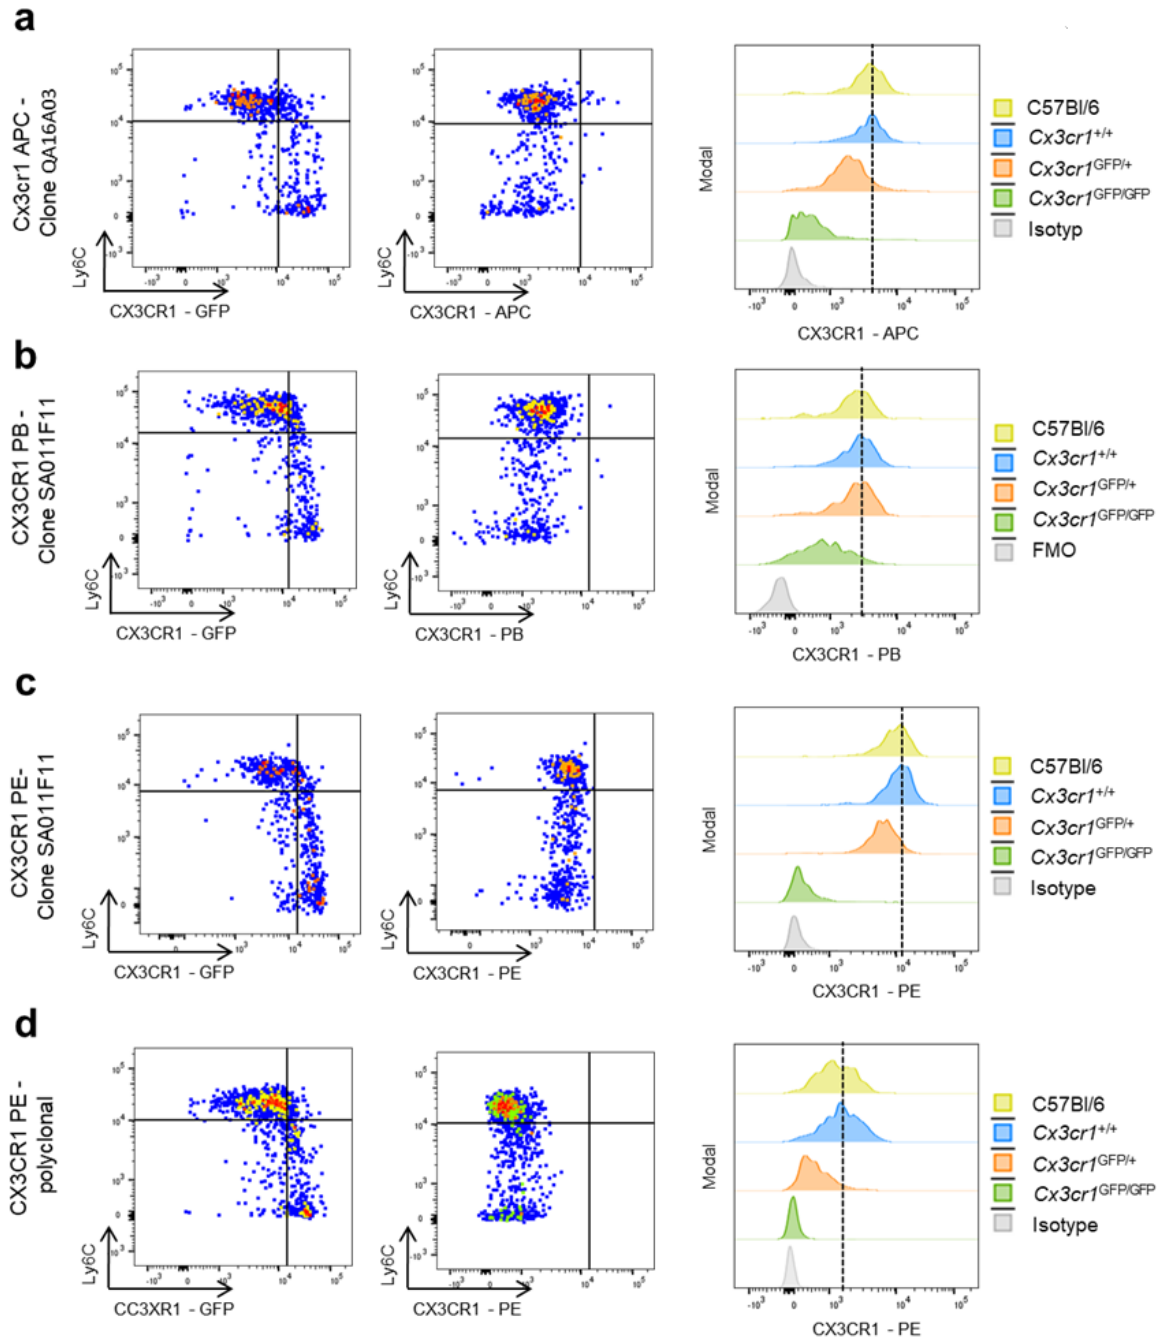

**Supplemental Figure S3:** Differential CX3CR1 reporter fluorescence signal, but not antibody staining on splenic monocytes in mice using different validated anti-CX3CR1 antibodies. **(a-d)** Representative flow cytometry showing the respective GFP signal (left panels) or antibody staining of CX3CR1 clone QA16A03 (APC, BioLegend) **(a)**, CX3CR1 clone SA011F11 (PB, BioLegend) **(b)**, CX3CR1 clone SA011F11 (PE, BioLegend) **(c)** and CX3CR1 polyclonal (PE, R&D) **(d)** of splenic monocytes from the same heterozygous *Cx3cr1*<sup>GFP/+</sup> reporter mice. Right panels: representative histograms of antibody staining in monocytes from the spleen of C57Bl/6 (WT, yellow) mice, WT littermates (*Cx3cr1*<sup>+/+</sup>, blue), heterozygous *Cx3cr1*<sup>GFP/+</sup> mice (red), homozygous *Cx3cr1*<sup>GFP/GFP</sup> mice (green) and isotype or fluorescence minus one (FMO) control (grey), respectively.

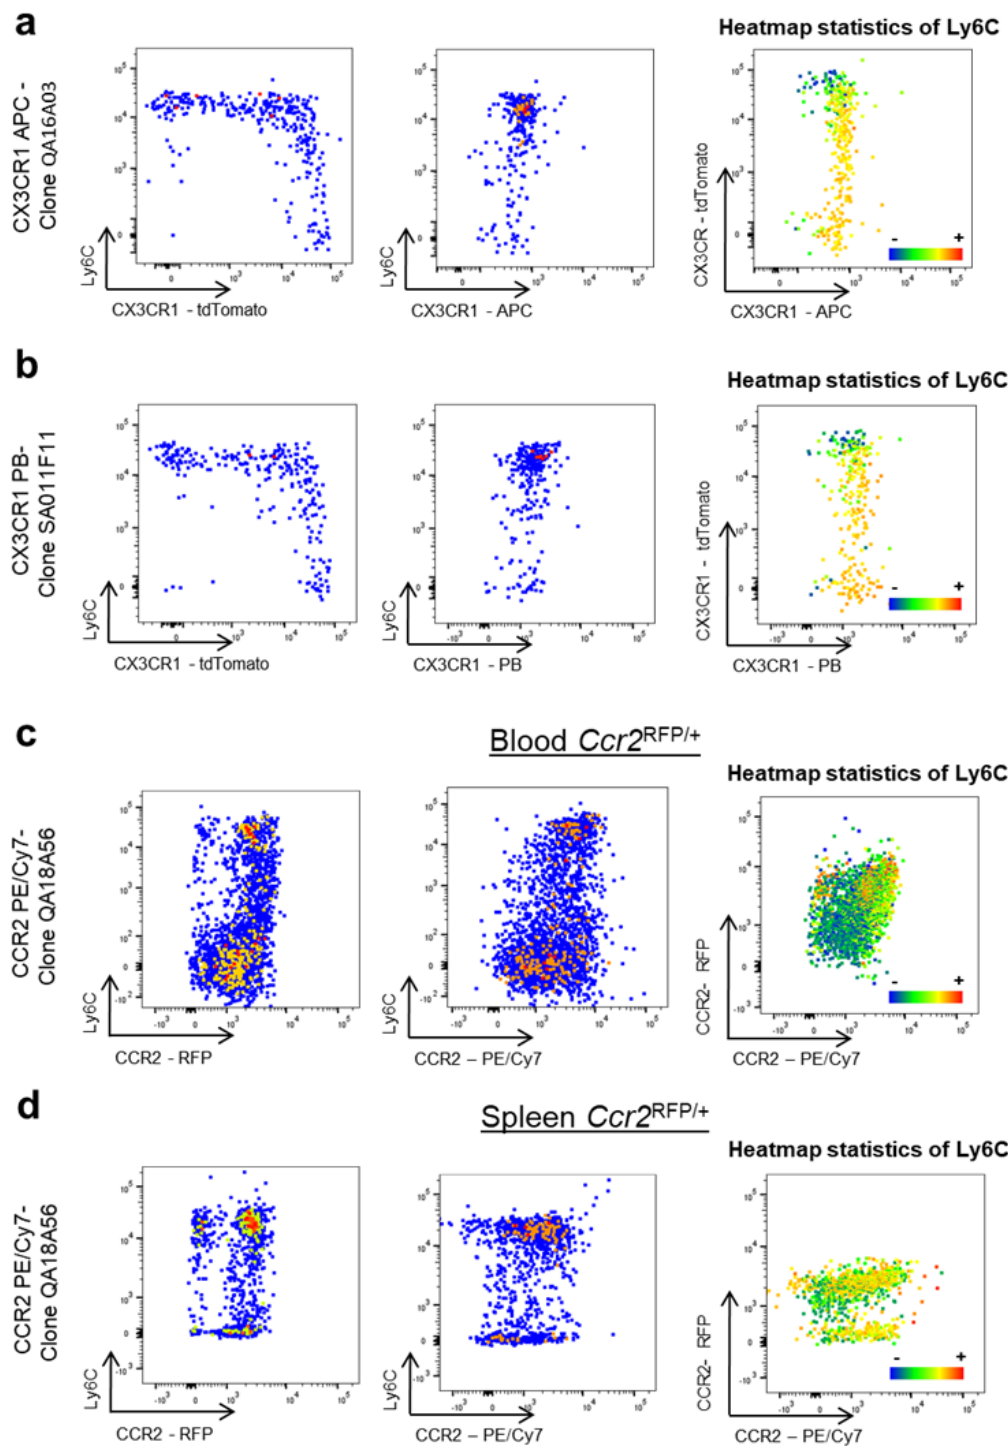

**Supplemental Figure S4:** (a, b) Validation of the differentially CX3CR1 reporter gene signal and antibody staining in tamoxifen-inducible *Cx3cr1* reporter mice. (a) Left panels: representative flow cytometry showing the CX3CR1-tdTomato signal or CX3CR1 (QA16A03, APC) antibody signal in monocytes from the spleen of tamoxifen inducible *Cx3cr1* reporter mice. Right panel: visualisation of the heatmap statistics of Ly6C expression. Red indicates high expression of Ly6C, while blue indicates low expression of Ly6C.

**(b)** Left panels: representative flow cytometry showing the CX3CR1-tdTomato signal or CX3CR1 (SA011F11, PacificBlue) antibody staining in monocytes from the spleen of tamoxifen-inducible *Cx3cr1* reporter mice. Right panel: heatmap statistics of Ly6C expression.

**(c, d)** Differential CCR2 antibody staining, but not reporter fluorescence signal on **(c)** peripheral blood monocytes and **(d)** splenic monocytes. Representative flow cytometry showing the RFP signal (left panels) or antibody staining of CCR2 clone QA18A56 (PE/Cy7, BioLegend) from the same *Ccr2<sup>RFP/+</sup>* reporter mice. Right panels: representative dot plots visualizing the heatmap statistics of Ly6C on monocytes from *Ccr2<sup>RFP/+</sup>* reporter mice. Red indicates a high expression of Ly6C while blue indicates low expression of Ly6C.

**Supplemental Table S1:** List of antibodies used for flow cytometry

| Target         | Fluorophore  | Clone               | Manufacturer  | Dilution factor |
|----------------|--------------|---------------------|---------------|-----------------|
| Cd11b          | BV711        | M1/80               | BioLegend     | 1:100           |
| Ly6G           | PerCp/Cy5.5  | 1A8                 | BioLegend     | 1:100           |
| Cd115          | BV605        | AF598               | BioLegend     | 1:50            |
| Ly6C           | APC/Cy7      | HK1.4               | BioLegend     | 1:100           |
| Ly6C           | FITC         | HK1.4               | BioLegend     | 1:200           |
| SiglecF        | BV421        | E50-2440            | BD Bioscience | 1:200           |
| Cd172a         | PE/Cy7       | P84                 | BioLegend     | 1:80            |
|                |              |                     |               |                 |
| CX3CR1         | APC          | QA16A03             | BioLegend     | 1:100           |
| CX3CR1         | Pacific Blue | SA011F11            | BioLegend     | 1:200           |
| CX3CR1         | PE           | SA011F11            | BioLegend     | 1:600           |
| CX3CR1         | PE           | Z8-50 (Z8-50.23)    | BD Bioscience | 1:200           |
| CX3CR1         | PE           | Polyclonal Goat IgG | R&D Systems   | 1:10            |
| Mouse IgG1, k  | APC          | MOPC-21             | BioLegend     | 1:100           |
| Mouse IgG2a, k | PE           | MOPC-173            | BioLegend     | 1:600           |
| Rat IgG2a, k   | PE           | RTK2758             | BioLegend     | 1:200           |
| Goat IgG       | PE           | Polyclonal          | R&D Systems   | 1:10            |
| CCR2           | PE/Cy7       | QA18A56             | BioLegend     | 1:50            |
| CCR2           | FITC         | SA203G11            | BioLegend     | 1:50            |
| Rat IgG2b, k   | PE/Cy7       | RTK4530             | BioLegend     | 1:50            |
| Rat IgG2b, k   | FITC         | RTK4530             | BioLegend     | 1:50            |

**Supplemental Table S2:** List of antibodies used for fluorescence-activated cell sorting

| Target | Fluorophore | Clone | Manufacturer | Dilution factor |
|--------|-------------|-------|--------------|-----------------|
| Cd11b  | APC         | M1/80 | BioLegend    | 1:100           |
| Ly6G   | BV421       | 1A8   | BioLegend    | 1:100           |
| Cd115  | PE/Cy7      | AFS98 | BioLegend    | 1:50            |
| Ly6C   | APC/Cy7     | HK1.4 | BioLegend    | 1:100           |
